# Supplementary material
Source: Springer Nature journal article supplement (https://www.springermedizin.de/resource/supplementary/12889_2012_5110_MOESM2_ESM.pdf/9496600)

**(a) Proportional Yield**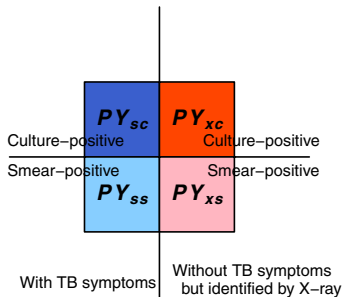**(b) Viet Nam 2006-7**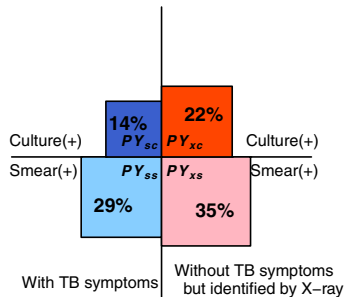**(c) Cambodia 2002**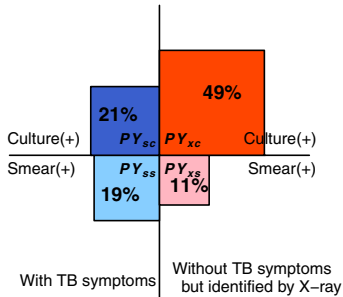**(d) Theoretical  
60% smear +ve / 40% symptomatic**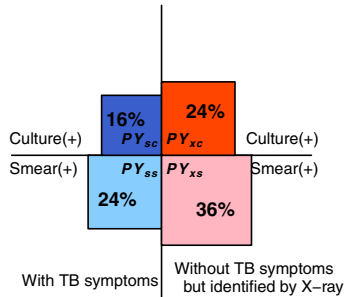

Supplement: MOESM2 [file 9496600]
